# Supplementary material for: Structural insights into the mechanism of pancreatic KATP channel regulation by nucleotides
Source: PubMed Central journal article supplement (PMC9120461; doi:10.1038/s41467-022-30430-4), 2022-05-19
Supplement: 41467_2022_30430_MOESM2_ESM.pdf [file 41467_2022_30430_MOESM2_ESM.pdf]

File name: Supplementary Movie 1

Description: Conformational changes of  $K_{ATP}$  channel from the close state to the pre-open state.

File name: Supplementary Movie 2

Description: Conformational changes of SUR1 from the repaglinidebound state to the Mg nucleotides and NN414-bound state.
